# Supplementary material
Source: PubMed Central journal article supplement (PMC389912)
Supplement: plntphys_134_3_890__1.pdf [file plntphys_134_3_890__1.pdf]

**Supplemental Table I.** Sequence analysis of tags extracted from three RL-SAGE clones of rice, maize and *M. grisea* libraries

| Tag No | Tag Sequence           | EST/Gene Accession No | EST/Gene Function      | Genomic DNA Accession No |
|--------|------------------------|-----------------------|------------------------|--------------------------|
| Rice   |                        |                       |                        |                          |
| 1      | CATGTAGTTCGGATTCTTGGC  | C99333                | Unknown                | AE017094                 |
| 2      | CATGTTGGGTTTATTTGTGTG  | CB655712              | Unknown                | AL606610                 |
| 3      | CATGTTCCGGCTGCACCGATGC | RICRUBPC2             | RuBiscCo small subunit | -                        |
| 4      | CATGGCGCCCGTCGCCGAGGG  | AK104462              | Unknown                | AP003261                 |
| 5      | CATGGGGTAGGCCTGGATTCC  | AK103072              | Unknown                | AP003794                 |
| 6      | CATGTAGCTAAAAGCAAGACG  | AK107775              | Unknown                | AB023482                 |
| 7      | CATGGATAATATTGATGATCT  | -                     | -                      | AL954825                 |
| 8      | CATGAGCTTTTCACTAAAAAA  | -                     | -                      | -                        |
| 9      | CATGCTTGCCGTTGCTTGTT   | CA753969              | Light-induced protein  | -                        |
| 10     | CATGCCTAATCTAGGGTAGAA  | -                     | -                      | -                        |
| 11     | CATGACAAGTTTTTGTTAATA  | AB110180              | RuBisCo activase       | -                        |
| 12     | CATGACTTGTAGGAAAATTTA  | -                     | -                      | -                        |
| 13     | CATGCTTGAATTTATCTGCCT  | -                     | -                      | AE017122                 |
| 14     | CATGGCTCACAAAAAAAAAAG  | -                     | -                      | -                        |
| 15     | CATGCGAGGGGTGAAACGACG  | AK110903              | Unknown                | -                        |
| 16     | CATGGTGCAGCAGTACCATAT  | CD921622              | Unknown                | AP004849                 |
| 17     | CATGCAGGATATCTATCTAAG  | -                     | -                      | AL662953                 |
| 18     | CATGTTCTGCTCCATTGTTGC  | CB656072              | Unknown                | -                        |
| 19     | CATGTAATGACTAAATGAGAT  | AK065877              | Unknown                | AP003847                 |
| 20     | CATGCTGCTGGATGTAGTAGA  | D29721                | Ribosomal L19          | AC134885                 |
| 21     | CATGGCCGTTCTTAGTTGGTG  | CF324485              | Unknown                | -                        |
| 22     | CATGAATGCAGATGTTTAGCC  | -                     | -                      | -                        |
| 23     | CATGTAATGGTAATCTCTTTT  | BI806061              | Unknown                | -                        |
| 24     | CATGGAATGAAATGAAATGAA  | -                     | -                      | AP004867                 |
| 25     | CATGTAAATAAGTAAGTTTGC  | -                     | -                      | AP002521                 |
| 26     | CATGTCGGACGTACATCGTTG  | -                     | -                      | -                        |
| 27     | CATGTTGTGTTTCATTTGTTCT | -                     | -                      | AP005258                 |

|    |                        |            |         |          |
|----|------------------------|------------|---------|----------|
| 28 | CATGTTGGCTATGTTGTGTAA  | AK104175   | Unknown | -        |
| 29 | CATGTAACAGCGAGCAGGGCC* | AY072712.1 | Ramy1   | AP000570 |
| 30 | CATGACCCTGATACCCGATGG  | AK070047   | Unknown | AP003683 |
| 31 | CATGGAGAGAGGGAAGGAAGG  | AK060886   | Unknown | AP003144 |
| 32 | CATGATTCTATCAGGGACGAG  | -          | -       | AP005406 |
| 33 | CATGTATTTGTCATTCTTAGT  | AK108424   | Unknown | AP000367 |
| 34 | CATGGCGACGCATCGCCTTCA  | X13909     | CAB2R   | AP003278 |
| 35 | CATGAAATCGAGGCTAGCGGC  | AY224579   | Unknown | -        |
| 36 | CATGGCGGCAAAGCAAGCGGC  | X 16099    | PALS    | -        |
| 37 | CATGTAACAGCGAGCAGGGCC* | AY072712   | Ramy1   | AP000570 |
| 38 | CATGATGGAATGTGAGACAAG  | -          | -       | AL606450 |
| 39 | CATGCCTTGTTGATTGTGTAC  | AF010321   | LHCA    | AP003804 |
| 40 | CATGGTTGGGCGTGTGTCGGT  | AK063598   | Unknown | AC092557 |

## Maize

|    |                       |          |            |          |
|----|-----------------------|----------|------------|----------|
| 1  | CATGTTATGCTCTGGTGAATT | BG840838 | Unknown    | -        |
| 2  | CATGATTAATGCTTTAGAAA  | BM380513 | Unknown    | -        |
| 3  | CATGCATTGCTGTGATGAATG | CF029406 | Unknown    | -        |
| 4  | CATGAAACTGTTATCGGGGAC | CF064346 | Unknown    | -        |
| 5  | CATGCTAGCTTCTTTATGTTG | AU101368 | Unknown    | -        |
| 6  | CATGGAACCATACTCTAAGGC | AF441191 | Calmodulin | AP003818 |
| 7  | CATGGCGGCAAAGCAAGCGGC | CF328516 | Unknown    | -        |
| 8  | CATGTGTTCCCTACTTTCAG  | CF337008 | Unknown    | -        |
| 9  | CATGTGGAGCTTATGTAATGA | CB650521 | Unknown    | -        |
| 10 | CATGCAAGTCGAACGGGAAGT | AY108281 | Unknown    | AE017114 |
| 11 | CATGTCGGACGTACATCGTTA | -        | -          | -        |
| 12 | CATGGATAATGTTTTTGCT   | AY104278 | Unknown    | -        |
| 13 | CATGCCAGGACATCAAAAAA  | -        | -          | -        |
| 14 | CATGCCCCGACCGCTCCGCTT | -        | -          | -        |
| 15 | CATGAAATTTCTTTCCAATTT | -        | -          | -        |
| 16 | CATGTAAATTTGAGCTTTGAA | -        | -          | -        |
| 17 | CATGAGCGTCCGGAAGCAGAT | AY104482 | Unknown    | -        |
| 18 | CATGTCAGGTCAGGATCTAAT | AY107092 | Unknown    | -        |
| 19 | CATGTGTTCCCTAAAAAAA   | -        | -          | -        |
| 20 | CATGGTACAGTGATACTGCTT | -        | -          | -        |
| 21 | CATGTATATAATCTTCACTAG | AK062172 | Unknown    | -        |

|    |                       |          |         |          |
|----|-----------------------|----------|---------|----------|
| 22 | CATGTAATGGTACATATCTCC | X68807   | Unknown | AP002969 |
| 23 | CATGGCAGATAGGCACGCTTC | AK109438 | Unknown | -        |
| 24 | CATGCACAACCCAATATATAG | -        | -       | AP005052 |
| 25 | CATGGTTAGTGGTCAGTCTCG | AY109465 | Unknown | -        |
| 26 | CATGGGTGATGAATGTGTACC | X83076   | Fer1    | -        |
| 27 | CATGTGTAATTACAGATTACA | -        | -       | -        |
| 28 | CATGCTGGTGCCTGATTCTG  | -        | -       | -        |
| 29 | CATGCCTTCATTCACCGTGGA | -        | -       | -        |
| 30 | CATGAATCTGAGTTCGTTTTG | -        | -       | -        |
| 31 | CATGCTCGTGGAAAATGCATA | -        | -       | -        |
| 32 | CATGGTAAATCAAATGTACAA | -        | -       | -        |

*M. grisea*

|    |                         |          |         |                 |
|----|-------------------------|----------|---------|-----------------|
| 1  | CATGTTATGGGCAAATGGAA    | CD035619 | Unknown | Contig 2.929*** |
| 2  | CATGGGGTGAAGGATAATGGG   | -        | -       | Contig 2.238    |
| 3  | CATGGGCAAATTACACCAGGA   | -        | -       | -               |
| 4  | CATGGTGAGAAAAGGAAGAAT   | -        | -       | Contig 2.206    |
| 5  | CATGATAAAAAAAAAAAAAAAAA | -        | -       | -               |
| 6  | CATGGACGGTGACGGAAGTTT   | -        | -       | -               |
| 7  | CATGGTTGGTACCCTGACCGC   | -        | -       | Contig 2.473    |
| 8  | CATGGCCGTTATTAGTTGGTG   | -        | -       | -               |
| 9  | CATGGTGCTTCCAGACACCA    | -        | -       | Contig 2.636    |
| 10 | CATGAACCAGTACCAGGGACT   | CD031621 | Unknown | -               |
| 11 | CATGATGGTGAATACAGAACA   | -        | -       | Contig 2.796    |
| 12 | CATGGGATGGCCGTTGTTAT**  | CA408239 | Unknown | -               |
| 13 | CATGAGCTCGCCGGCACCAAG   | -        | -       | -               |
| 14 | CATGGCAGTTCAGTTTTCTCC   | CF278993 | Unknown | -               |
| 15 | CATGGGATGGCCGTTGTTAT**  | CA408239 | Unknown | -               |
| 16 | CATGCCAAGAAGGGCAAGAA    | BM866561 | Unknown | -               |
| 17 | CATGAATAGGGTTTTTTAATT   | BU645042 | Unknown | -               |
| 18 | CATGACGCGCTCCGTTGATGA   | -        | -       | Contig 2.692    |
| 19 | CATGAGTGTATGAGAAATAA    | -        | -       | Contig 2.644    |
| 20 | CATGTCCAAGATTGAAAATTT   | -        | -       | Contig 2.2049   |
| 21 | CATGATAACTTCTCGAAAAGC   | -        | -       | -               |
| 22 | CATGGTTTCGGCCAAGTTGGC   | BU641190 | Unknown | -               |
| 23 | CATGTATGTATATGGTATGAA   | BM871385 | Unknown | -               |

|    |                        |          |                    |               |
|----|------------------------|----------|--------------------|---------------|
| 24 | CATGCCTGTTTCGAGCGTCATT | AY265323 | 5.8S ribosomal RNA | -             |
| 25 | CATGGAGATGTACAAATGGGC  | BU642751 | Unknown            | -             |
| 26 | CATGTCGAAAATCACCGTCGC  | BM873037 | Unknown            | -             |
| 27 | CATGACTTAAACGAAATTTCT  | BM866259 | Unknown            | -             |
| 28 | CATGGTACCTACCTAGACGAG  | -        | -                  | Contig 2.17   |
| 29 | CATGCACGGCTCACTCACTGT  | -        | -                  | Contig 2.916  |
| 30 | CATGTAAACTAATAATTATGA  | CD031712 | Unknown            | -             |
| 31 | CATGTCGGACGTACATCGTTA  | -        | -                  | -             |
| 32 | CATGAAGTTGAGCTATTCTAC  | BU644716 | Unknown            | -             |
| 33 | CATGCACATAGTACAGGTGTT  | -        | -                  | Contig 2.1507 |
| 34 | CATGTTATGGGCAAATGGAA   | BM871600 | Unknown            | -             |
| 35 | CATGTTATTTCTTCTAAAGT   | -        | -                  | Contig 2.689  |
| 36 | CATGCTAACTGTGCGATGA    | -        | -                  | Contig 2.632  |
| 37 | CATGTTGCCATAATCAAGTCT  | -        | -                  | -             |
| 38 | CATGGATACAAACGACCGACA  | -        | -                  | -             |

---

\* Two copies in rice clone

\*\* Two copies in *M. grisea* clone

\*\*\* *M. grisea* genomic contigs from <http://www-genome.wi.mit.edu/annotation/fungi/magnaporthe>.
